# Supplementary material for: Imaging Measurement of Whole Gut Transit Time in Paediatric and Adult Functional Gastrointestinal Disorders: A Systematic Review and Narrative Synthesis
Source: MDPI journal article supplement (doi:10.3390/diagnostics9040221), 2019-12-13
Supplement: s1 [file s1]

MEDLINE

|    |                                                                                                                                                                                                                                                           |                                  |
|----|-----------------------------------------------------------------------------------------------------------------------------------------------------------------------------------------------------------------------------------------------------------|----------------------------------|
| 1  | (gastroint)                                                                                                                                                                                                                                               | 4744 Advanced Display Results    |
|    |                                                                                                                                                                                                                                                           | More                             |
| 2  | (transit adj2 (colon* or bowel or gastro* or intestin* or GI)) :t,ab.                                                                                                                                                                                     | 4796 Advanced Display Results    |
|    |                                                                                                                                                                                                                                                           | More                             |
| 3  | 1 or 2                                                                                                                                                                                                                                                    | 7642 Advanced Display Results    |
|    |                                                                                                                                                                                                                                                           | More                             |
| 4  | exp Diagnostic Imaging/                                                                                                                                                                                                                                   | 2517281 Advanced Display Results |
|    |                                                                                                                                                                                                                                                           | More                             |
| 5  | (imaging or MRI or "magnetic resonance" or "MR imaging" or "radio-opaque" or radiopaque or ROM or "gamma scintigraphy" or "nuclear medicine" or radiolabel or "radio label" or "wireless telemetric" or "wireless capsule" or "magnetic tracking") :t,ab. | 903430 Advanced Display Results  |
|    |                                                                                                                                                                                                                                                           | More                             |
| 6  | 4 or 5                                                                                                                                                                                                                                                    | 2885325 Advanced Display Results |
|    |                                                                                                                                                                                                                                                           | More                             |
| 7  | exp Intestinal Diseases/                                                                                                                                                                                                                                  | 602406 Advanced Display Results  |
|    |                                                                                                                                                                                                                                                           | More                             |
| 8  | ("functional gastrointestinal disorder*" or constipat* or "irritable bowel" or IBS or dyspepsia).t,ab.                                                                                                                                                    | 44061 Advanced Display Results   |
|    |                                                                                                                                                                                                                                                           | More                             |
| 9  | 7 or 8                                                                                                                                                                                                                                                    | 631051 Advanced Display Results  |
|    |                                                                                                                                                                                                                                                           | More                             |
| 10 | 3 and 6 and 9                                                                                                                                                                                                                                             | 701 Advanced Display Results     |
|    |                                                                                                                                                                                                                                                           | More                             |
| 11 | limit 10 to (english language and humans)                                                                                                                                                                                                                 | 536 Advanced Display Results     |
|    |                                                                                                                                                                                                                                                           | More                             |
| 12 | limit 11 to yw*2014..Current*                                                                                                                                                                                                                             | 71 Advanced Display Results      |
|    |                                                                                                                                                                                                                                                           | More                             |
| 13 | limit 12 to last 10 years                                                                                                                                                                                                                                 | 71 Advanced Display Results      |
|    |                                                                                                                                                                                                                                                           | More                             |
| 14 | limit 11 to last 10 years                                                                                                                                                                                                                                 | 182 Advanced Display Results     |
|    |                                                                                                                                                                                                                                                           | More                             |

WoS

|     |                          |                                                                                                                  |
|-----|--------------------------|------------------------------------------------------------------------------------------------------------------|
| # 5 | 357 (#4) AND I Edit      | Indexes=SCI-EXPANDED, SSCI, A&HCI, CPCI-S, CPCI-SSH, BKCI-S, BKCI-SSH, ESCI, CCR-EXPANDED, IC Timespan=All years |
| # 4 | 371 #3 AND #2 Edit       | Indexes=SCI-EXPANDED, SSCI, A&HCI, CPCI-S, CPCI-SSH, BKCI-S, BKCI-SSH, ESCI, CCR-EXPANDED, IC Timespan=All years |
| # 3 | 57,114 TS=("func Edit    | Indexes=SCI-EXPANDED, SSCI, A&HCI, CPCI-S, CPCI-SSH, BKCI-S, BKCI-SSH, ESCI, CCR-EXPANDED, IC Timespan=All years |
| # 2 | 2,538,059 TS=(imagi Edit | Indexes=SCI-EXPANDED, SSCI, A&HCI, CPCI-S, CPCI-SSH, BKCI-S, BKCI-SSH, ESCI, CCR-EXPANDED, IC Timespan=All years |
| # 1 | 7,617 TS=(transi Edit    | Indexes=SCI-EXPANDED, SSCI, A&HCI, CPCI-S, CPCI-SSH, BKCI-S, BKCI-SSH, ESCI, CCR-EXPANDED, IC Timespan=All years |

Supplementary Figure 1: Databases search strategy.

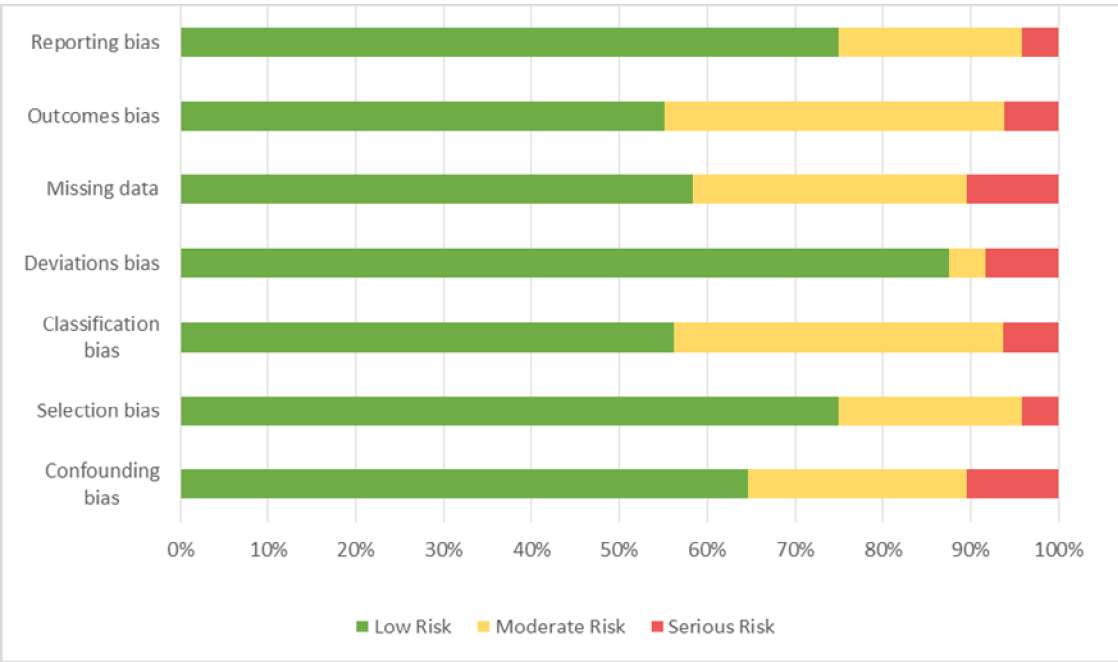

Supplementary Figure 2: Quality scores for the risk of bias using the ROBINS tool.
